# Supplementary material for: Cytokine signatures of end organ injury in COVID-19
Source: PubMed Central journal article supplement (PMC8206105; doi:10.1038/s41598-021-91859-z), 2021-06-15
Supplement: 41598_2021_91859_MOESM1_ESM.pdf [file 41598_2021_91859_MOESM1_ESM.pdf]

# Cytokine Signatures of End Organ Injury in COVID-19

Luis G. Gómez-Escobar<sup>1</sup>, Katherine L. Hoffman<sup>2</sup>, Justin J. Choi<sup>3</sup>, Alain Borczuk<sup>4</sup>, Steven Salvatore<sup>4</sup>, Sergio L. Alvarez-Mulett<sup>1</sup>, Manuel D. Galvan<sup>5</sup>, Zhen Zhao<sup>4</sup>, Sabrina E. Racine-Brzostek<sup>4</sup>, He S. Yang<sup>4</sup>, Heather Winona Stout-Delgado<sup>1</sup>, Mary E Choi<sup>6</sup>, Augustine MK Choi<sup>1</sup>, Soo Jung Cho<sup>1\*</sup>, Edward J. Schenck<sup>1\*</sup>

<sup>1</sup> Division of Pulmonary and Critical Care Medicine, Department of Medicine, Weill Cornell Medicine, New York, New York.

<sup>2</sup> Division of Biostatistics, Department of Population Health Sciences, Weill Cornell Medicine, New York, New York.

<sup>3</sup> Department of Medicine, Weill Cornell Medicine, New York, New York.

<sup>4</sup> Department of Pathology and Laboratory Medicine, Weill Cornell Medicine, New York, New York.

<sup>5</sup> Advanced Diagnostics Laboratories, National Jewish Health, Denver, Colorado.

<sup>6</sup> Division of Nephrology and Hypertension, Department of Medicine, Weill Cornell Medicine, New York, New York.

**\* Corresponding Authors. These authors jointly supervised this work.**

**Correspondence to:**

Edward J. Schenck

Division of Pulmonary and Critical Care Medicine

1300 York Avenue

New York, NY 10065

Phone : 212-746-2262

Email : [ejs9005@med.cornell.edu](mailto:ejs9005@med.cornell.edu)

## Supplementary Materials.

### Serum Isolation Protocol

Remnant serum specimen from COVID 19 RT-PCR positive patients between March 03, 2020 and April 01, 2020 were collected and stored at -80°C until further analysis. Any patients with remnant serum from at least one Serum Separator Tube (SST) during the time period of 72 hours after admission were included in the study. Standard practices for serum collection and storage at NewYork Presbyterian/Weill Cornell Medical College include collecting venous blood into an SST tube and serum is physically separated from cells (centrifuged at 1500 g for 7 minutes) as soon as possible with a maximum limit of 2 hours from the time of collection. The specimen are typically stored at 4C for 1-5 days before coded/deidentified, transferred to a new coded tube and frozen at -80C. When serum specimen were needed for additional testing, the tube was retrieved and thawed at 4C, at which point the necessary aliquots were taken for testing.

**Supplementary Table 1.** Admission Diagnosis COVID-19 negative patients.

| Characteristic                         | COVID-19 Negative (N=51) |
|----------------------------------------|--------------------------|
| Sepsis-suspected                       | 2                        |
| Pneumonia                              | 10                       |
| Heart failure                          | 3                        |
| Acute Respiratory Failure              | 3                        |
| Altered Mental Status                  | 1                        |
| Drug/alcohol overdose                  | 1                        |
| Asthma exacerbation                    | 1                        |
| Chest pain                             |                          |
| Cardiovascular                         |                          |
| Acute myocardial infarction            | 2                        |
| Unstable angina                        | 2                        |
| Pericarditis/cardiac tamponade         | 1                        |
| Pleuritic                              | 1                        |
| Acute kidney injury                    | 3                        |
| Other infection                        |                          |
| Blood                                  | 3                        |
| Genito/urinary tract                   | 1                        |
| Respiratory tract other than pneumonia | 4                        |
| Gastrointestinal tract                 | 1                        |
| Trauma                                 | 1                        |

|       |    |
|-------|----|
| Other | 11 |
|-------|----|

**Supplementary Table 2.** Demographics and baseline characteristics COVID-19 patients with repetitive measures (Day 1, 2 and 3). P-values are computed from Kruskal-Wallis, Fisher's Exact, or Chi-square tests, as appropriate.

| Characteristic                               | COVID-19 Positive (N=90) | COVID-19 Positive with repeat samples (N=15) | p.value |
|----------------------------------------------|--------------------------|----------------------------------------------|---------|
| <b>Demographics</b>                          |                          |                                              |         |
| Age (median, IQR)                            | 66 (57, 77)              | 63 (59, 75)                                  | 0.7     |
| Sex (n, %)                                   |                          |                                              | 0.3     |
| Female                                       | 33 (37%)                 | 3 (20%)                                      |         |
| Male                                         | 57 (63%)                 | 12 (80%)                                     |         |
| Race (n, %)                                  |                          |                                              | >0.9    |
| Asian                                        | 6 (7.5%)                 | 1 (7.7%)                                     |         |
| Black                                        | 12 (15%)                 | 2 (15%)                                      |         |
| Other                                        | 18 (22%)                 | 2 (15%)                                      |         |
| White                                        | 44 (55%)                 | 8 (62%)                                      |         |
| BMI (median, IQR)                            | 28 (23, 31)              | 28 (24, 31)                                  | >0.9    |
| Smoking status (n, %)                        |                          |                                              | 0.4     |
| Former Smoker                                | 30 (33%)                 | 3 (20%)                                      |         |
| No                                           | 60 (67%)                 | 12 (80%)                                     |         |
| <b>Comorbidities (n, %)</b>                  |                          |                                              |         |
| CAD                                          | 13 (14%)                 | 1 (6.7%)                                     | 0.7     |
| DM                                           | 28 (31%)                 | 4 (27%)                                      | >0.9    |
| HTN                                          | 51 (57%)                 | 7 (47%)                                      | 0.7     |
| CVA                                          | 9 (10%)                  | 2 (13%)                                      | 0.7     |
| CKD/ESRD                                     | 9 (10%)                  | 1 (6.7%)                                     | >0.9    |
| Cirrhosis                                    | 1 (1.1%)                 | 1 (6.7%)                                     | 0.3     |
| COPD                                         | 6 (6.7%)                 | 0 (0%)                                       | 0.6     |
| Asthma                                       | 10 (11%)                 | 1 (6.7%)                                     | >0.9    |
| Active cancer                                | 11 (12%)                 | 2 (13%)                                      | >0.9    |
| Immunosuppressed state                       | 4 (4.4%)                 | 2 (13%)                                      | 0.2     |
| <b>Home Medications (n, %)</b>               |                          |                                              |         |
| Immunosuppression medications (past 30 days) | 15 (17%)                 | 6 (40%)                                      | 0.073   |
| ACE/ARBs                                     | 25 (28%)                 | 5 (33%)                                      | 0.8     |
| Statins                                      | 33 (37%)                 | 6 (40%)                                      | >0.9    |
| NSAIDs                                       | 24 (27%)                 | 2 (13%)                                      | 0.3     |
| PPIs                                         | 21 (23%)                 | 3 (20%)                                      | >0.9    |

**Supplementary Table 3.** Median and interquartile range of expression of inflammatory cytokines of COVID-19 patients with repetitive measures (Day 1, 2 and 3). Q-value represents the p-value computed from Freidman’s test for differences across days after adjustment for multiple comparisons. **Relative to Supplemental Figure 1.**

| Cytokine        | Day 1                | Day 2                | Day 3                | q-value |
|-----------------|----------------------|----------------------|----------------------|---------|
| TNF-β           | 9.5 (8.0, 13.3)      | 8.0 (8.0, 11.8)      | 8.0 (8.0, 14.0)      | 0.47    |
| TNF-α           | 99 (65, 119)         | 97 (76, 109)         | 79 (66, 96)          | 0.72    |
| TGF-α           | 14 (10, 23)          | 10 (7, 19)           | 11 (9, 18)           | 0.96    |
| sCD40L          | 1022 (609, 2220)     | 1201 (451, 1550)     | 1397 (803, 2437)     | 0.96    |
| PDGF-AB/PDGF-BB | 30028 (27038, 33606) | 31935 (23271, 33519) | 31975 (21838, 32921) | 0.96    |
| PDGF-AA         | 4168 (3060, 5631)    | 4383 (3142, 4760)    | 4216 (2337, 5256)    | 0.95    |
| CCL4/MIP-1β     | 49 (34, 56)          | 49 (41, 67)          | 48 (40, 66)          | 0.95    |
| CCL3/MIP-1α     | 19 (16, 29)          | 18 (16, 31)          | 16 (16, 24)          | 0.96    |
| CXCL9/MIG       | 3855 (2420, 5506)    | 4404 (2603, 6940)    | 4476 (2781, 6304)    | 0.85    |
| CCL22/MDC       | 472 (348, 625)       | 372 (277, 576)       | 342 (269, 537)       | 0.47    |
| CCL7/MCP3       | 43 (40, 79)          | 62 (40, 79)          | 54 (44, 99)          | 0.47    |
| CCL2/MCP1       | 1272 (902, 2103)     | 1362 (847, 2556)     | 1582 (1055, 2552)    | 0.2     |
| CSF-1/M-CSF     | 518 (460, 582)       | 547 (342, 690)       | 515 (411, 650)       | 0.95    |
| CXCL10/IP-10    | 3849 (2353, 9403)    | 3769 (2340, 8585)    | 2793 (1032, 7075)    | 0.85    |
| IFN-γ           | 31 (15, 45)          | 33 (17, 46)          | 21 (18, 34)          | 0.96    |
| IFN-α2          | 40 (40, 42)          | 40 (40, 70)          | 40 (40, 40)          | 0.95    |
| IL-9            | 15 (9, 20)           | 14 (10, 19)          | 15 (12, 19)          | 0.95    |
| IL-8            | 32 (23, 56)          | 37 (24, 48)          | 32 (29, 55)          | 0.96    |
| IL-7            | 11.8 (5.8, 16.1)     | 11.7 (7.5, 15.4)     | 10.0 (3.9, 14.5)     | 0.95    |
| IL-6            | 130 (54, 188)        | 81 (56, 144)         | 136 (83, 194)        | 0.85    |
| IL-5            | 3.9 (3.2, 4.7)       | 4.0 (3.4, 7.1)       | 5.6 (3.8, 11.7)      | 0.72    |
| IL-4            | 3.20 (3.20, 3.20)    | 3.20 (3.20, 3.20)    | 3.20 (3.20, 3.20)    | 0.85    |
| IL-27           | 4614 (2334, 5718)    | 4517 (2487, 7012)    | 4284 (2076, 9188)    | 0.96    |
| IL-1RA          | 51 (27, 80)          | 41 (23, 397)         | 31 (21, 64)          | 0.95    |
| IL-1β           | 8 (8, 17)            | 11 (8, 16)           | 8 (8, 13)            | 0.95    |
| IL-18           | 64 (47, 132)         | 64 (46, 140)         | 101 (57, 149)        | 0.47    |
| IL-17E/IL-25    | 459 (359, 563)       | 458 (360, 556)       | 363 (278, 547)       | 0.47    |
| IL-17A          | 6.4 (6.4, 10.0)      | 6.4 (6.4, 8.4)       | 6.4 (6.4, 8.0)       | 0.96    |
| IL-15           | 30 (19, 36)          | 28 (20, 37)          | 26 (21, 39)          | 1       |
| IL-13           | 32.0 (32.0, 35.1)    | 32.0 (32.0, 32.0)    | 32.0 (32.0, 32.0)    | 0.95    |
| IL-12 (p40)     | 53 (32, 81)          | 58 (37, 83)          | 52 (36, 78)          | 0.96    |
| IL-10           | 47 (32, 68)          | 58 (32, 91)          | 40 (28, 77)          | 0.95    |
| CXCL1/GROα      | 55 (44, 64)          | 46 (25, 65)          | 40 (30, 58)          | 0.95    |

|             |                |                |                |      |
|-------------|----------------|----------------|----------------|------|
| G-CSF       | 78 (53, 139)   | 77 (32, 110)   | 34 (24, 84)    | 0.47 |
| Fractalkine | 160 (160, 185) | 160 (160, 207) | 160 (160, 169) | 0.95 |
| FLT-3L      | 30 (22, 37)    | 29 (23, 34)    | 28 (23, 33)    | 0.96 |
| FGF-2       | 198 (166, 265) | 194 (170, 258) | 223 (163, 254) | 0.96 |
| Eotaxin     | 146 (73, 168)  | 127 (84, 159)  | 105 (70, 168)  | 0.96 |
| EGF         | 59 (33, 99)    | 39 (27, 104)   | 42 (26, 95)    | 0.95 |

**Supplementary Table 4.** 8-Plex Cytokine differences in COVID-19 patients compared to controls.  
8-Plex Cytokine differences in COVID-19 patients compared to controls.

| Cytokine      | Log FC (95% CI)     | q-value |
|---------------|---------------------|---------|
| IL-10         | 1.37 (0.59, 2.14)   | 0.003   |
| IL-6          | 1.04 (0.17, 1.9)    | 0.047   |
| IFN- $\gamma$ | 0.72 (0.07, 1.38)   | 0.049   |
| TNF- $\alpha$ | 0.49 (-0.05, 1.02)  | 0.091   |
| IL-4          | -0.34 (-1.42, 0.74) | 0.539   |

a. COVID-19 patients cytokine expression by repeat measures (day 1, 2, and 3).

| Cytokine      | Day 1       | Day 2       | Day 3       | q-value |
|---------------|-------------|-------------|-------------|---------|
| TNF- $\alpha$ | 15 (9, 29)  | 16 (10, 37) | 18 (8, 39)  | 0.48    |
| IL-6          | 26 (11, 70) | 25 (13, 62) | 25 (9, 73)  | 0.45    |
| IL-4          | 3 (3, 11)   | 3 (3, 8)    | 3 (3, 6)    | 0.36    |
| IL-10         | 31 (12, 53) | 35 (15, 56) | 29 (12, 50) | 0.48    |
| IFN- $\gamma$ | 8 (3, 24)   | 8 (3, 24)   | 4 (3, 20)   | 0.31    |

**Supplementary Table 5.** Expression of inflammatory cytokines in COVID-19 patients compared to controls on day 1 of hospital admission. Estimates and 95% Confidence Intervals (CI) are computed from linear regression models with robust standard errors. Q-value represents the p-value after adjustment for multiple comparisons. Relative to **Figure 1 and Supplemental Figure 1.**

| Cytokine        | Log FC (95% CI)   | q-value |
|-----------------|-------------------|---------|
| CXCL10/IP-10    | 3.52 (2.85, 4.19) | <.001   |
| TNF- $\alpha$   | 0.5 (0.28, 0.71)  | <.001   |
| IFN- $\alpha$ 2 | 0.36 (0.2, 0.52)  | <.001   |
| IL-1RA          | 1.24 (0.66, 1.82) | <.001   |
| IFN- $\gamma$   | 0.99 (0.48, 1.51) | 0.001   |
| CSF-1/M-CSF     | 0.48 (0.2, 0.75)  | 0.005   |
| CCL2/MCP1       | 0.63 (0.26, 1)    | 0.005   |
| CCL7/MCP3       | 0.15 (0.06, 0.24) | 0.008   |
| IL-7            | 0.49 (0.17, 0.81) | 0.011   |
| IL-15           | 0.27 (0.07, 0.46) | 0.029   |
| IL-12 (p40)     | 0.41 (0.1, 0.72)  | 0.037   |
| IL-6            | 0.98 (0.19, 1.76) | 0.048   |

|                                      |                      |              |
|--------------------------------------|----------------------|--------------|
| <b>CCL4/MIP-1<math>\beta</math></b>  | -0.48 (-0.87, -0.09) | <b>0.048</b> |
| <b>IL-10</b>                         | 0.58 (0.07, 1.1)     | 0.073        |
| <b>FLT-3L</b>                        | 0.41 (0.01, 0.82)    | 0.117        |
| <b>Fractalkine</b>                   | 0.1 (0, 0.2)         | 0.139        |
| <b>CCL22/MDC</b>                     | -0.3 (-0.62, 0.01)   | 0.139        |
| <b>TNF-<math>\beta</math></b>        | 0.14 (-0.02, 0.29)   | 0.168        |
| <b>PDGF-AA</b>                       | 0.37 (-0.07, 0.81)   | 0.205        |
| <b>IL-17A</b>                        | 0.18 (-0.05, 0.4)    | 0.221        |
| <b>IL-18</b>                         | 0.41 (-0.1, 0.92)    | 0.221        |
| <b>sCD40L</b>                        | -0.47 (-1.08, 0.14)  | 0.233        |
| <b>IL-5</b>                          | -0.28 (-0.65, 0.09)  | 0.233        |
| <b>CXCL1/GRO<math>\alpha</math></b>  | 0.32 (-0.26, 0.89)   | 0.461        |
| <b>IL-17E/IL-25</b>                  | 0.14 (-0.13, 0.42)   | 0.492        |
| <b>IL-4</b>                          | 0.08 (-0.09, 0.25)   | 0.567        |
| <b>FGF-2</b>                         | 0.07 (-0.13, 0.27)   | 0.701        |
| <b>PDGF-AB/PDGF-BB</b>               | 0.12 (-0.23, 0.48)   | 0.701        |
| <b>IL-8</b>                          | 0.18 (-0.41, 0.77)   | 0.733        |
| <b>IL-1<math>\beta</math></b>        | 0.09 (-0.22, 0.4)    | 0.737        |
| <b>IL-27</b>                         | -0.11 (-0.62, 0.41)  | 0.865        |
| <b>CXCL9/MIG</b>                     | -0.08 (-0.62, 0.46)  | 0.909        |
| <b>CCL3/MIP-1<math>\alpha</math></b> | -0.06 (-0.47, 0.35)  | 0.909        |
| <b>Eotaxin</b>                       | 0.03 (-0.31, 0.37)   | 0.96         |
| <b>TGF-<math>\alpha</math></b>       | -0.04 (-0.45, 0.37)  | 0.96         |
| <b>G-CSF</b>                         | -0.04 (-0.63, 0.56)  | 0.969        |
| <b>IL-9</b>                          | -0.01 (-0.37, 0.34)  | 0.969        |
| <b>IL-13</b>                         | 0 (-0.11, 0.12)      | 0.969        |
| <b>EGF</b>                           | 0 (-0.42, 0.41)      | 0.995        |

**Supplementary Table 6.** Expression of inflammatory cytokines in COVID-19 mild and severe cases on day 1 of hospital admission. Estimates and 95% Confidence Intervals (CI) are computed from linear regression models with robust standard errors. Q-value represents the p-value after adjustment for multiple comparisons. Relative to **Figure 2**.

| <b>Cytokine</b>                | <b>Log FC (95% CI)</b> | <b>q-value</b>  |
|--------------------------------|------------------------|-----------------|
| <b>IL-6</b>                    | 1.54 (0.85, 2.24)      | <b>&lt;.001</b> |
| <b>CXCL10/IP-10</b>            | 1.73 (0.98, 2.49)      | <b>&lt;.001</b> |
| <b>TNF-<math>\alpha</math></b> | 0.65 (0.35, 0.96)      | <b>&lt;.001</b> |
| <b>IL-1RA</b>                  | 1.45 (0.67, 2.22)      | <b>0.003</b>    |
| <b>IL-8</b>                    | 0.89 (0.38, 1.41)      | <b>0.004</b>    |
| <b>CSF-1/M-CSF</b>             | 0.55 (0.24, 0.87)      | <b>0.004</b>    |
| <b>G-CSF</b>                   | 0.98 (0.34, 1.62)      | <b>0.015</b>    |
| <b>CCL2/MCP1</b>               | 0.58 (0.2, 0.97)       | <b>0.015</b>    |
| <b>CCL7/MCP3</b>               | 0.26 (0.08, 0.45)      | <b>0.02</b>     |

|                     |                      |              |
|---------------------|----------------------|--------------|
| PDGF-AA             | -0.55 (-0.95, -0.15) | <b>0.028</b> |
| PDGF-AB/PDGF-BB     | -0.4 (-0.71, -0.08)  | <b>0.045</b> |
| IL-10               | 0.68 (0.11, 1.25)    | <b>0.059</b> |
| IL-15               | 0.38 (0.06, 0.71)    | <b>0.059</b> |
| IL-27               | 0.52 (-0.03, 1.08)   | 0.181        |
| FLT-3L              | 0.32 (-0.03, 0.66)   | 0.187        |
| Fractalkine         | 0.15 (-0.02, 0.32)   | 0.187        |
| FGF-2               | 0.25 (-0.08, 0.58)   | 0.301        |
| IL-18               | 0.41 (-0.13, 0.95)   | 0.301        |
| Eotaxin             | 0.27 (-0.11, 0.64)   | 0.311        |
| IL-9                | 0.32 (-0.13, 0.76)   | 0.311        |
| CCL22/MDC           | -0.24 (-0.6, 0.12)   | 0.344        |
| sCD40L              | 0.46 (-0.28, 1.21)   | 0.347        |
| EGF                 | -0.3 (-0.76, 0.17)   | 0.347        |
| CCL4/MIP-1 $\beta$  | 0.2 (-0.12, 0.52)    | 0.347        |
| TGF- $\alpha$       | 0.4 (-0.21, 1)       | 0.347        |
| IL-13               | 0.11 (-0.08, 0.29)   | 0.402        |
| CXCL1/GRO $\alpha$  | 0.34 (-0.3, 0.97)    | 0.422        |
| TNF- $\beta$        | 0.14 (-0.13, 0.42)   | 0.422        |
| IL-17E/IL-25        | 0.19 (-0.22, 0.6)    | 0.488        |
| IL-5                | 0.16 (-0.21, 0.52)   | 0.526        |
| IL-1 $\beta$        | 0.17 (-0.29, 0.63)   | 0.591        |
| IL-4                | -0.09 (-0.35, 0.17)  | 0.597        |
| IL-12 (p40)         | 0.16 (-0.31, 0.63)   | 0.603        |
| CXCL9/MIG           | 0.14 (-0.34, 0.62)   | 0.657        |
| IFN- $\alpha$ 2     | 0.05 (-0.27, 0.38)   | 0.842        |
| IL-7                | -0.06 (-0.5, 0.38)   | 0.842        |
| IL-17A              | 0.06 (-0.36, 0.48)   | 0.842        |
| IFN- $\gamma$       | 0.03 (-0.65, 0.7)    | 0.962        |
| CCL3/MIP-1 $\alpha$ | 0.01 (-0.44, 0.46)   | 0.964        |

**Supplementary Table 7.** Significant clinical laboratory and cytokine correlations in COVID-19 patients and controls. Correlation coefficients are estimated using Spearman's correlation formula. All significant ( $p < 0.05$ ) correlation pairs prior to adjustment for multiple comparisons are shown. Q-value represents the p-value after adjustment for multiple comparisons. Relative to **Figure 3**.

a. Among controls

| Cytokine        | Lab        | N  | Spearman's Correlation | p-value | q-value     |
|-----------------|------------|----|------------------------|---------|-------------|
| PDGF-AB/PDGF-BB | Platelet   | 51 | 0.78                   | <.001   | <.001       |
| PDGF-AA         | Platelet   | 51 | 0.71                   | <.001   | <.001       |
| VEGF-A          | Platelet   | 51 | 0.58                   | <.001   | <.001       |
| CSF-1/M-CSF     | Creatinine | 51 | 0.46                   | <.001   | <b>0.05</b> |

|                                |                    |    |       |       |             |
|--------------------------------|--------------------|----|-------|-------|-------------|
| <b>CCL2/MCP1</b>               | Creatinine         | 51 | 0.44  | 0.001 | <b>0.08</b> |
| <b>IL-7</b>                    | Platelet           | 51 | 0.41  | 0.003 | 0.13        |
| <b>IL-13</b>                   | Ferritin           | 7  | -0.93 | 0.003 | 0.13        |
| <b>PDGF-AB/PDGF-BB</b>         | INR                | 32 | -0.5  | 0.004 | 0.14        |
| <b>PDGF-AA</b>                 | INR                | 32 | -0.5  | 0.004 | 0.14        |
| <b>IL-1<math>\beta</math></b>  | Ferritin           | 7  | -0.91 | 0.005 | 0.14        |
| <b>IL-17E/IL-25</b>            | Platelet           | 51 | 0.38  | 0.005 | 0.14        |
| <b>IL-10</b>                   | Platelet           | 51 | -0.38 | 0.006 | 0.14        |
| <b>TGF-<math>\alpha</math></b> | Ferritin           | 7  | -0.9  | 0.006 | 0.14        |
| <b>CCL22/MDC</b>               | Platelet           | 51 | 0.38  | 0.007 | 0.15        |
| <b>IL-27</b>                   | Procalcitonin      | 15 | 0.67  | 0.007 | 0.15        |
| <b>TNF-<math>\alpha</math></b> | Platelet           | 51 | -0.37 | 0.008 | 0.15        |
| <b>CXCL9/MIG</b>               | Platelet           | 51 | -0.37 | 0.008 | 0.15        |
| <b>IL-1<math>\beta</math></b>  | Procalcitonin      | 15 | -0.64 | 0.009 | 0.17        |
| <b>CXCL10/IP-10</b>            | Creatinine         | 51 | 0.36  | 0.01  | 0.17        |
| <b>EGF</b>                     | Platelet           | 51 | 0.35  | 0.01  | 0.19        |
| <b>CSF-1/M-CSF</b>             | Procalcitonin      | 15 | 0.63  | 0.01  | 0.19        |
| <b>PDGF-AB/PDGF-BB</b>         | C-Reactive Protein | 7  | -0.86 | 0.01  | 0.2         |
| <b>CXCL10/IP-10</b>            | LDH                | 11 | 0.69  | 0.02  | 0.25        |
| <b>IL-6</b>                    | Procalcitonin      | 15 | 0.6   | 0.02  | 0.25        |
| <b>CXCL9/MIG</b>               | Creatinine         | 51 | 0.33  | 0.02  | 0.25        |
| <b>Eotaxin</b>                 | D-Dimer            | 6  | -0.88 | 0.02  | 0.26        |
| <b>TNF-<math>\beta</math></b>  | LDH                | 11 | -0.68 | 0.02  | 0.26        |
| <b>CSF-1/M-CSF</b>             | Platelet           | 51 | -0.32 | 0.02  | 0.26        |
| <b>IL-9</b>                    | C-Reactive Protein | 7  | -0.82 | 0.02  | 0.26        |
| <b>IL-27</b>                   | Platelet           | 51 | -0.31 | 0.03  | 0.29        |
| <b>IL-8</b>                    | Creatinine         | 51 | 0.3   | 0.03  | 0.29        |
| <b>IL-13</b>                   | C-Reactive Protein | 7  | -0.8  | 0.03  | 0.29        |
| <b>IL-17A</b>                  | Ferritin           | 7  | -0.8  | 0.03  | 0.29        |
| <b>IL-17F</b>                  | Ferritin           | 7  | -0.8  | 0.03  | 0.29        |
| <b>IL-13</b>                   | Procalcitonin      | 15 | -0.55 | 0.04  | 0.32        |
| <b>TNF-<math>\alpha</math></b> | Creatinine         | 51 | 0.29  | 0.04  | 0.32        |
| <b>IL-1RA</b>                  | Creatinine         | 51 | 0.29  | 0.04  | 0.35        |
| <b>G-CSF</b>                   | Platelet           | 51 | -0.28 | 0.04  | 0.37        |
| <b>G-CSF</b>                   | Creatinine         | 51 | 0.28  | 0.05  | 0.4         |
| <b>CCL2/MCP1</b>               | Procalcitonin      | 15 | 0.52  | 0.05  | 0.4         |
| <b>IL-6</b>                    | Platelet           | 51 | -0.28 | 0.05  | 0.4         |

b. Among COVID-19 patients

| Cytokine | Lab | N | R | p-value | q-value |
|----------|-----|---|---|---------|---------|
|----------|-----|---|---|---------|---------|



|                                |                    |    |      |       |                 |
|--------------------------------|--------------------|----|------|-------|-----------------|
| <b>PDGF-AB/PDGF-BB</b>         | Platelet           | 85 | 0.71 | <.001 | <b>&lt;.001</b> |
| <b>PDGF-AA</b>                 | Platelet           | 85 | 0.66 | <.001 | <b>&lt;.001</b> |
| <b>IL-6</b>                    | C-Reactive Protein | 50 | 0.75 | <.001 | <b>&lt;.001</b> |
| <b>CXCL10/IP-10</b>            | C-Reactive Protein | 50 | 0.6  | <.001 | <b>&lt;.001</b> |
| <b>TNF-<math>\alpha</math></b> | C-Reactive Protein | 50 | 0.59 | <.001 | <b>&lt;.001</b> |
| <b>IL-7</b>                    | Platelet           | 85 | 0.45 | <.001 | <b>&lt;.001</b> |
| <b>IL-6</b>                    | LDH                | 51 | 0.56 | <.001 | <b>&lt;.001</b> |
| <b>CXCL9/MIG</b>               | Ferritin           | 42 | 0.59 | <.001 | <b>0.002</b>    |
| <b>Fractalkine</b>             | Creatinine         | 84 | 0.42 | <.001 | <b>0.003</b>    |
| <b>EGF</b>                     | Platelet           | 85 | 0.41 | <.001 | <b>0.003</b>    |
| <b>CXCL9/MIG</b>               | Procalcitonin      | 73 | 0.44 | <.001 | <b>0.004</b>    |
| <b>TNF-<math>\alpha</math></b> | Ferritin           | 42 | 0.54 | <.001 | <b>0.006</b>    |
| <b>IL-12 (p40)</b>             | Creatinine         | 84 | 0.37 | <.001 | <b>0.01</b>     |
| <b>IL-6</b>                    | Procalcitonin      | 73 | 0.39 | <.001 | <b>0.02</b>     |
| <b>CXCL9/MIG</b>               | Creatinine         | 84 | 0.35 | 0.001 | <b>0.03</b>     |
| <b>IL-10</b>                   | C-Reactive Protein | 50 | 0.43 | 0.002 | <b>0.04</b>     |
| <b>IL-27</b>                   | C-Reactive Protein | 50 | 0.43 | 0.002 | <b>0.04</b>     |
| <b>IL-10</b>                   | Ferritin           | 42 | 0.45 | 0.003 | 0.06            |
| <b>IL-27</b>                   | Procalcitonin      | 73 | 0.34 | 0.003 | 0.06            |
| <b>FGF-2</b>                   | Ferritin           | 42 | 0.44 | 0.004 | 0.06            |
| <b>IL-18</b>                   | Ferritin           | 42 | 0.44 | 0.004 | 0.06            |
| <b>IL-4</b>                    | C-Reactive Protein | 50 | -0.4 | 0.004 | 0.07            |
| <b>CXCL10/IP-10</b>            | Procalcitonin      | 73 | 0.33 | 0.004 | 0.07            |
| <b>FLT-3L</b>                  | C-Reactive Protein | 50 | 0.39 | 0.005 | 0.07            |
| <b>CSF-1/M-CSF</b>             | Ferritin           | 42 | 0.42 | 0.006 | 0.08            |
| <b>FGF-2</b>                   | C-Reactive Protein | 50 | 0.39 | 0.006 | 0.08            |
| <b>CXCL10/IP-10</b>            | Ferritin           | 42 | 0.42 | 0.006 | 0.08            |
| <b>FLT-3L</b>                  | Ferritin           | 42 | 0.41 | 0.006 | 0.08            |
| <b>IFN-<math>\gamma</math></b> | Ferritin           | 42 | 0.41 | 0.006 | 0.08            |
| <b>IL-15</b>                   | Ferritin           | 42 | 0.41 | 0.007 | 0.08            |
| <b>TNF-<math>\alpha</math></b> | Procalcitonin      | 73 | 0.31 | 0.008 | 0.1             |
| <b>IL-17A</b>                  | Creatinine         | 84 | 0.28 | 0.009 | 0.1             |
| <b>IL-8</b>                    | Ferritin           | 42 | 0.4  | 0.009 | 0.1             |
| <b>IL-1RA</b>                  | C-Reactive Protein | 50 | 0.36 | 0.009 | 0.1             |
| <b>IL-1RA</b>                  | Ferritin           | 42 | 0.39 | 0.01  | 0.1             |
| <b>IL-6</b>                    | Ferritin           | 42 | 0.39 | 0.01  | 0.1             |

|                    |                    |    |       |      |      |
|--------------------|--------------------|----|-------|------|------|
| CSF-1/M-CSF        | Procalcitonin      | 73 | 0.29  | 0.01 | 0.11 |
| CCL2/MCP1          | D-Dimer            | 31 | 0.44  | 0.01 | 0.12 |
| EGF                | Procalcitonin      | 73 | -0.29 | 0.01 | 0.12 |
| CCL2/MCP1          | Procalcitonin      | 73 | 0.28  | 0.02 | 0.14 |
| FGF-2              | Procalcitonin      | 73 | 0.28  | 0.02 | 0.14 |
| G-CSF              | C-Reactive Protein | 50 | 0.34  | 0.02 | 0.14 |
| IL-15              | Creatinine         | 84 | 0.26  | 0.02 | 0.15 |
| CCL4/MIP-1 $\beta$ | Ferritin           | 42 | 0.36  | 0.02 | 0.16 |
| CXCL10/IP-10       | LDH                | 51 | 0.32  | 0.02 | 0.17 |
| TNF- $\alpha$      | LDH                | 51 | 0.32  | 0.02 | 0.17 |
| IL-18              | Procalcitonin      | 73 | 0.27  | 0.02 | 0.17 |
| CCL7/MCP3          | D-Dimer            | 31 | 0.4   | 0.02 | 0.17 |
| CCL2/MCP1          | LDH                | 51 | 0.32  | 0.02 | 0.17 |
| CSF-1/M-CSF        | C-Reactive Protein | 50 | 0.32  | 0.02 | 0.17 |
| CCL22/MDC          | Procalcitonin      | 73 | -0.26 | 0.03 | 0.19 |
| CCL2/MCP1          | Ferritin           | 42 | 0.33  | 0.03 | 0.21 |
| sCD40L             | C-Reactive Protein | 50 | 0.3   | 0.03 | 0.21 |
| IL-22              | Procalcitonin      | 73 | -0.25 | 0.03 | 0.21 |
| CCL7/MCP3          | Procalcitonin      | 73 | 0.25  | 0.03 | 0.21 |
| TNF- $\beta$       | Procalcitonin      | 73 | 0.24  | 0.04 | 0.24 |
| IL-17E/IL-25       | Ferritin           | 42 | 0.32  | 0.04 | 0.24 |
| IL-1 $\beta$       | Creatinine         | 84 | 0.22  | 0.04 | 0.25 |
| CCL2/MCP1          | C-Reactive Protein | 50 | 0.29  | 0.04 | 0.25 |
| TNF- $\beta$       | Ferritin           | 42 | 0.31  | 0.04 | 0.26 |
| IL-18              | C-Reactive Protein | 50 | 0.28  | 0.05 | 0.27 |
| TGF- $\alpha$      | Ferritin           | 42 | 0.31  | 0.05 | 0.27 |
| IL-10              | LDH                | 51 | 0.28  | 0.05 | 0.27 |

**Supplementary Table 8.** Associations between day 1 of hospital admission cytokine expression levels and clinical outcomes. Hazard ratios and 95% confidence intervals (CI) are estimated from Cox Proportional Hazard models with robust standard errors. P-values with and without (q-value) adjustment for multiple comparisons are shown.

a. Development of Acute Kidney Injury

| Cytokine     | Hazard Ratio for AKI (95% CI) | p-value | q-value |
|--------------|-------------------------------|---------|---------|
| FGF-2        | 1.49 (1.21, 1.84)             | <0.001  | <0.001  |
| IL-1 $\beta$ | 1.42 (1.21, 1.67)             | <0.001  | <0.001  |
| IL-1RA       | 1.47 (1.25, 1.73)             | <0.001  | <0.001  |
| IL-4         | 1.85 (1.34, 2.55)             | <0.001  | <0.001  |

|                     |                   |        |                  |
|---------------------|-------------------|--------|------------------|
| IL-6                | 1.33 (1.15, 1.54) | <0.001 | <b>&lt;0.001</b> |
| IL-12 (p40)         | 1.53 (1.24, 1.89) | <0.001 | <b>&lt;0.001</b> |
| IL-13               | 1.61 (1.33, 1.96) | <0.001 | <b>&lt;0.001</b> |
| IL-15               | 1.84 (1.39, 2.45) | <0.001 | <b>&lt;0.001</b> |
| IL-17A              | 1.4 (1.2, 1.63)   | <0.001 | <b>&lt;0.001</b> |
| CCL3/MIP-1 $\alpha$ | 1.59 (1.29, 1.97) | <0.001 | <b>&lt;0.001</b> |
| Fractalkine         | 2.5 (1.4, 4.47)   | 0.002  | <b>0.007</b>     |
| CSF-1/M-CSF         | 1.79 (1.16, 2.75) | 0.008  | <b>0.02</b>      |
| TGF- $\alpha$       | 1.14 (1.04, 1.24) | 0.005  | <b>0.02</b>      |
| G-CSF               | 1.29 (1.06, 1.58) | 0.01   | <b>0.04</b>      |
| TNF- $\alpha$       | 1.66 (1.09, 2.51) | 0.02   | <b>0.047</b>     |
| EGF                 | 0.71 (0.52, 0.97) | 0.03   | 0.07             |
| CCL4/MIP-1 $\beta$  | 1.59 (0.99, 2.56) | 0.06   | 0.13             |
| IL-18               | 1.4 (0.96, 2.05)  | 0.08   | 0.17             |
| IL-9                | 1.32 (0.96, 1.83) | 0.09   | 0.18             |
| IL-17E/IL-25        | 1.24 (0.96, 1.6)  | 0.1    | 0.2              |
| IL-10               | 1.25 (0.93, 1.69) | 0.14   | 0.25             |
| IFN- $\alpha$ 2     | 1.31 (0.89, 1.95) | 0.18   | 0.31             |
| CXCL10/IP-10        | 1.16 (0.92, 1.46) | 0.2    | 0.34             |
| PDGF-AA             | 0.84 (0.63, 1.11) | 0.22   | 0.36             |
| IL-8                | 1.21 (0.86, 1.71) | 0.28   | 0.44             |
| IL-5                | 1.22 (0.83, 1.81) | 0.32   | 0.48             |
| PDGF-AB/PDGF-BB     | 0.85 (0.6, 1.2)   | 0.35   | 0.49             |
| TNF- $\beta$        | 1.18 (0.84, 1.66) | 0.34   | 0.49             |
| CXCL9/MIG           | 1.16 (0.84, 1.61) | 0.37   | 0.5              |
| IFN- $\gamma$       | 1.09 (0.85, 1.39) | 0.48   | 0.61             |
| CCL2/MCP1           | 1.15 (0.78, 1.69) | 0.48   | 0.61             |
| Eotaxin             | 1.14 (0.72, 1.79) | 0.58   | 0.68             |
| IL-27               | 1.08 (0.84, 1.38) | 0.55   | 0.68             |
| IL-7                | 0.92 (0.64, 1.33) | 0.66   | 0.76             |
| FLT-3L              | 1.11 (0.64, 1.92) | 0.7    | 0.78             |
| CCL7/MCP3           | 0.87 (0.41, 1.87) | 0.72   | 0.78             |
| CXCL1/GRO $\alpha$  | 1.04 (0.81, 1.33) | 0.77   | 0.81             |
| sCD40L              | 0.99 (0.82, 1.2)  | 0.95   | 0.95             |
| CCL22/MDC           | 1.02 (0.67, 1.56) | 0.93   | 0.95             |

b. Mortality

| Cytokine        | Hazard Ratio for Mortality (95% CI) | p-value | q-value          |
|-----------------|-------------------------------------|---------|------------------|
| IFN- $\alpha$ 2 | 2.18 (1.48, 3.21)                   | <0.001  | <b>&lt;0.001</b> |
| IL-13           | 2.11 (1.52, 2.92)                   | <0.001  | <b>&lt;0.001</b> |
| TNF- $\beta$    | 1.79 (1.35, 2.37)                   | <0.001  | <b>&lt;0.001</b> |

|                     |                   |       |              |
|---------------------|-------------------|-------|--------------|
| TGF- $\alpha$       | 1.27 (1.09, 1.49) | 0.003 | <b>0.03</b>  |
| IL-18               | 0.76 (0.62, 0.92) | 0.006 | <b>0.049</b> |
| IL-9                | 1.53 (1.03, 2.28) | 0.03  | 0.16         |
| IL-17E/IL-25        | 1.53 (1.04, 2.24) | 0.03  | 0.16         |
| CSF-1/M-CSF         | 1.69 (1.03, 2.76) | 0.04  | 0.16         |
| CCL22/MDC           | 1.84 (1.06, 3.2)  | 0.03  | 0.16         |
| Eotaxin             | 1.61 (0.99, 2.62) | 0.06  | 0.2          |
| FLT-3L              | 1.5 (1, 2.25)     | 0.05  | 0.2          |
| IL-8                | 1.28 (0.98, 1.68) | 0.07  | 0.24         |
| IL-5                | 1.35 (0.96, 1.9)  | 0.08  | 0.25         |
| EGF                 | 1.56 (0.9, 2.69)  | 0.11  | 0.31         |
| Fractalkine         | 1.47 (0.79, 2.72) | 0.23  | 0.42         |
| G-CSF               | 1.13 (0.94, 1.35) | 0.18  | 0.42         |
| CXCL1/GRO $\alpha$  | 1.19 (0.92, 1.55) | 0.19  | 0.42         |
| IL-4                | 1.56 (0.77, 3.17) | 0.22  | 0.42         |
| IL-6                | 0.9 (0.75, 1.08)  | 0.25  | 0.42         |
| IL-12 (p40)         | 1.28 (0.87, 1.89) | 0.21  | 0.42         |
| CCL2/MCP1           | 1.34 (0.85, 2.1)  | 0.21  | 0.42         |
| CCL7/MCP3           | 1.29 (0.85, 1.94) | 0.23  | 0.42         |
| PDGF-AB/PDGF-BB     | 1.21 (0.87, 1.69) | 0.25  | 0.42         |
| IL-1 $\beta$        | 1.27 (0.82, 1.97) | 0.29  | 0.47         |
| IFN- $\gamma$       | 0.79 (0.49, 1.27) | 0.34  | 0.52         |
| IL-17A              | 1.25 (0.75, 2.07) | 0.39  | 0.56         |
| IL-27               | 0.89 (0.69, 1.16) | 0.39  | 0.56         |
| CXCL9/MIG           | 1.16 (0.82, 1.65) | 0.4   | 0.56         |
| PDGF-AA             | 1.12 (0.84, 1.49) | 0.43  | 0.57         |
| TNF- $\alpha$       | 1.18 (0.76, 1.82) | 0.46  | 0.6          |
| IL-1RA              | 1.05 (0.87, 1.27) | 0.61  | 0.71         |
| IL-10               | 1.06 (0.83, 1.34) | 0.64  | 0.71         |
| CXCL10/IP-10        | 0.96 (0.82, 1.13) | 0.63  | 0.71         |
| CCL3/MIP-1 $\alpha$ | 1.21 (0.63, 2.29) | 0.57  | 0.71         |
| CCL4/MIP-1 $\beta$  | 0.88 (0.53, 1.47) | 0.63  | 0.71         |
| IL-7                | 1.07 (0.73, 1.57) | 0.72  | 0.78         |
| sCD40L              | 0.98 (0.74, 1.31) | 0.91  | 0.95         |
| FGF-2               | 0.95 (0.36, 2.52) | 0.92  | 0.95         |
| IL-15               | 1.01 (0.3, 3.44)  | 0.98  | 0.98         |

c. Development of Acute Respiratory Distress Syndrome

| Cytokine | Hazard Ratio for ARDS (95% CI) | p-value | q-value        |
|----------|--------------------------------|---------|----------------|
| IL-1RA   | 1.35 (1.19, 1.53)              | <0.001  | < <b>0.001</b> |
| IL-6     | 1.34 (1.18, 1.52)              | <0.001  | < <b>0.001</b> |

|                                      |                   |        |                  |
|--------------------------------------|-------------------|--------|------------------|
| <b>CXCL10/IP-10</b>                  | 1.48 (1.32, 1.67) | <0.001 | <b>&lt;0.001</b> |
| <b>TNF-<math>\alpha</math></b>       | 2.03 (1.46, 2.8)  | <0.001 | <b>&lt;0.001</b> |
| <b>CCL7/MCP3</b>                     | 2.56 (1.56, 4.22) | <0.001 | <b>0.002</b>     |
| <b>G-CSF</b>                         | 1.2 (1.08, 1.34)  | <0.001 | <b>0.004</b>     |
| <b>IL-13</b>                         | 1.29 (1.11, 1.49) | <0.001 | <b>0.004</b>     |
| <b>CSF-1/M-CSF</b>                   | 1.73 (1.25, 2.39) | <0.001 | <b>0.004</b>     |
| <b>Fractalkine</b>                   | 2.02 (1.31, 3.11) | 0.001  | <b>0.006</b>     |
| <b>PDGF-AB/PDGF-BB</b>               | 0.76 (0.64, 0.9)  | 0.002  | <b>0.007</b>     |
| <b>IL-8</b>                          | 1.45 (1.12, 1.87) | 0.005  | <b>0.02</b>      |
| <b>CCL2/MCP1</b>                     | 1.67 (1.17, 2.39) | 0.005  | <b>0.02</b>      |
| <b>PDGF-AA</b>                       | 0.78 (0.65, 0.94) | 0.009  | <b>0.03</b>      |
| <b>TGF-<math>\alpha</math></b>       | 1.1 (1.02, 1.2)   | 0.02   | 0.06             |
| <b>TNF-<math>\beta</math></b>        | 1.26 (1.03, 1.54) | 0.02   | 0.06             |
| <b>IL-10</b>                         | 1.23 (1.01, 1.5)  | 0.04   | 0.09             |
| <b>FLT-3L</b>                        | 1.31 (0.98, 1.75) | 0.07   | 0.15             |
| <b>IL-15</b>                         | 1.3 (0.97, 1.75)  | 0.08   | 0.15             |
| <b>IL-27</b>                         | 1.23 (0.99, 1.53) | 0.07   | 0.15             |
| <b>sCD40L</b>                        | 1.13 (0.97, 1.33) | 0.13   | 0.25             |
| <b>IL-9</b>                          | 1.18 (0.94, 1.48) | 0.15   | 0.26             |
| <b>IL-18</b>                         | 1.25 (0.93, 1.68) | 0.15   | 0.26             |
| <b>CCL4/MIP-1<math>\beta</math></b>  | 1.3 (0.92, 1.84)  | 0.14   | 0.26             |
| <b>Eotaxin</b>                       | 1.29 (0.89, 1.87) | 0.18   | 0.27             |
| <b>FGF-2</b>                         | 1.19 (0.92, 1.55) | 0.18   | 0.27             |
| <b>CCL22/MDC</b>                     | 0.81 (0.61, 1.09) | 0.16   | 0.27             |
| <b>CXCL1/GRO<math>\alpha</math></b>  | 1.12 (0.92, 1.36) | 0.27   | 0.39             |
| <b>IL-17E/IL-25</b>                  | 1.11 (0.9, 1.37)  | 0.31   | 0.43             |
| <b>EGF</b>                           | 0.86 (0.63, 1.18) | 0.35   | 0.47             |
| <b>IL-1<math>\beta</math></b>        | 1.09 (0.89, 1.33) | 0.4    | 0.52             |
| <b>IL-12 (p40)</b>                   | 1.09 (0.88, 1.35) | 0.44   | 0.53             |
| <b>CXCL9/MIG</b>                     | 1.13 (0.84, 1.5)  | 0.42   | 0.53             |
| <b>IL-4</b>                          | 0.82 (0.43, 1.56) | 0.55   | 0.65             |
| <b>IL-5</b>                          | 1.08 (0.84, 1.38) | 0.57   | 0.65             |
| <b>IFN-<math>\gamma</math></b>       | 1.03 (0.88, 1.21) | 0.69   | 0.77             |
| <b>IL-17A</b>                        | 1.03 (0.82, 1.3)  | 0.8    | 0.86             |
| <b>IFN-<math>\alpha</math>2</b>      | 1.02 (0.76, 1.38) | 0.9    | 0.95             |
| <b>IL-7</b>                          | 0.99 (0.76, 1.3)  | 0.96   | 0.96             |
| <b>CCL3/MIP-1<math>\alpha</math></b> | 1.01 (0.81, 1.25) | 0.95   | 0.96             |

**Supplementary Table 9.** Baseline demographics of Autopsy patients

| Characteristic            | COVID-19 Positive N=9 | Lung controls N= | Kidney controls N=5  |
|---------------------------|-----------------------|------------------|----------------------|
| Age                       | 67.4                  |                  | 57.8                 |
| Sex, Female               | 22% (2)               |                  | 60% (3)              |
| Race                      |                       |                  |                      |
| Asian                     | 2                     |                  |                      |
| Black                     | 2                     |                  | 2                    |
| Not Specified             | 0                     |                  | 2                    |
| Other(Hispanic)           | 2                     |                  |                      |
| White                     | 3                     |                  | 1                    |
| BMI                       | 27.75 (n=8)           |                  | 30.35 (n=2)          |
| Smoking status            | 4 former, no current  |                  | unknown              |
| Underlying lung disease   | 2 OSA, 1 COPD         |                  | 1 COPD, 1 Bronchitis |
| Underlying kidney disease | 1 ESRD (DN)           |                  | none                 |

Supplementary Figure 1. Cytokine expression of COVID-19 and control patients

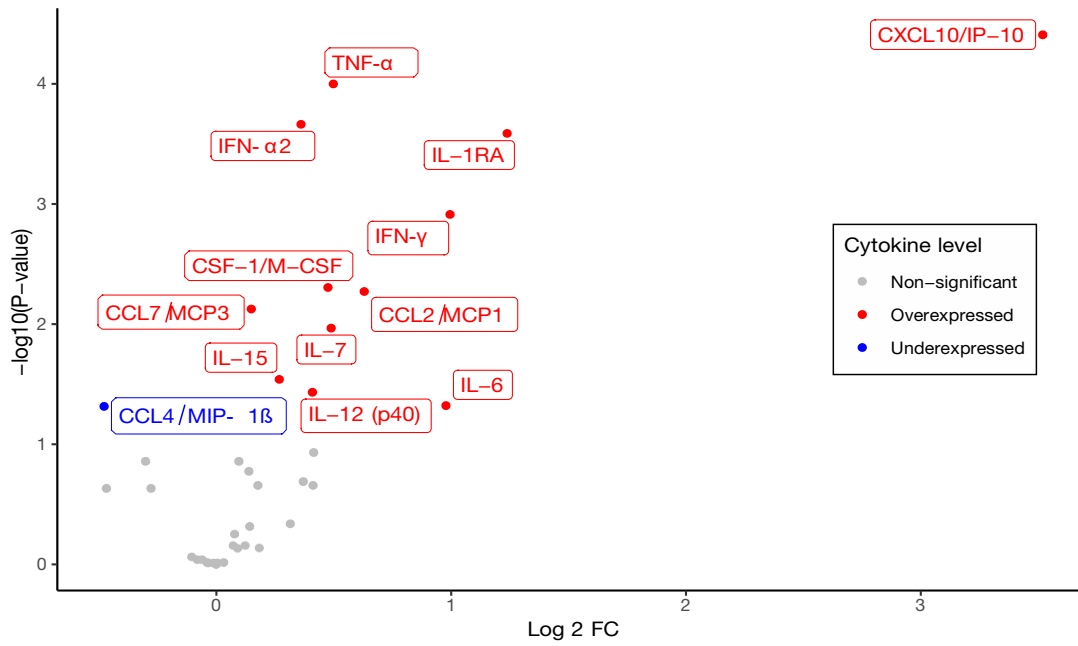

Volcano plot showing the log fold-change expression of significant cytokines between COVID-19 patients versus controls. P-values are on the negative log 10 scale and were computed from linear regression models with robust standard errors, after adjustment for multiple comparisons.

## Supplementary Figure 2. Cytokine trajectories of COVID-19 patients with repetitive measures.

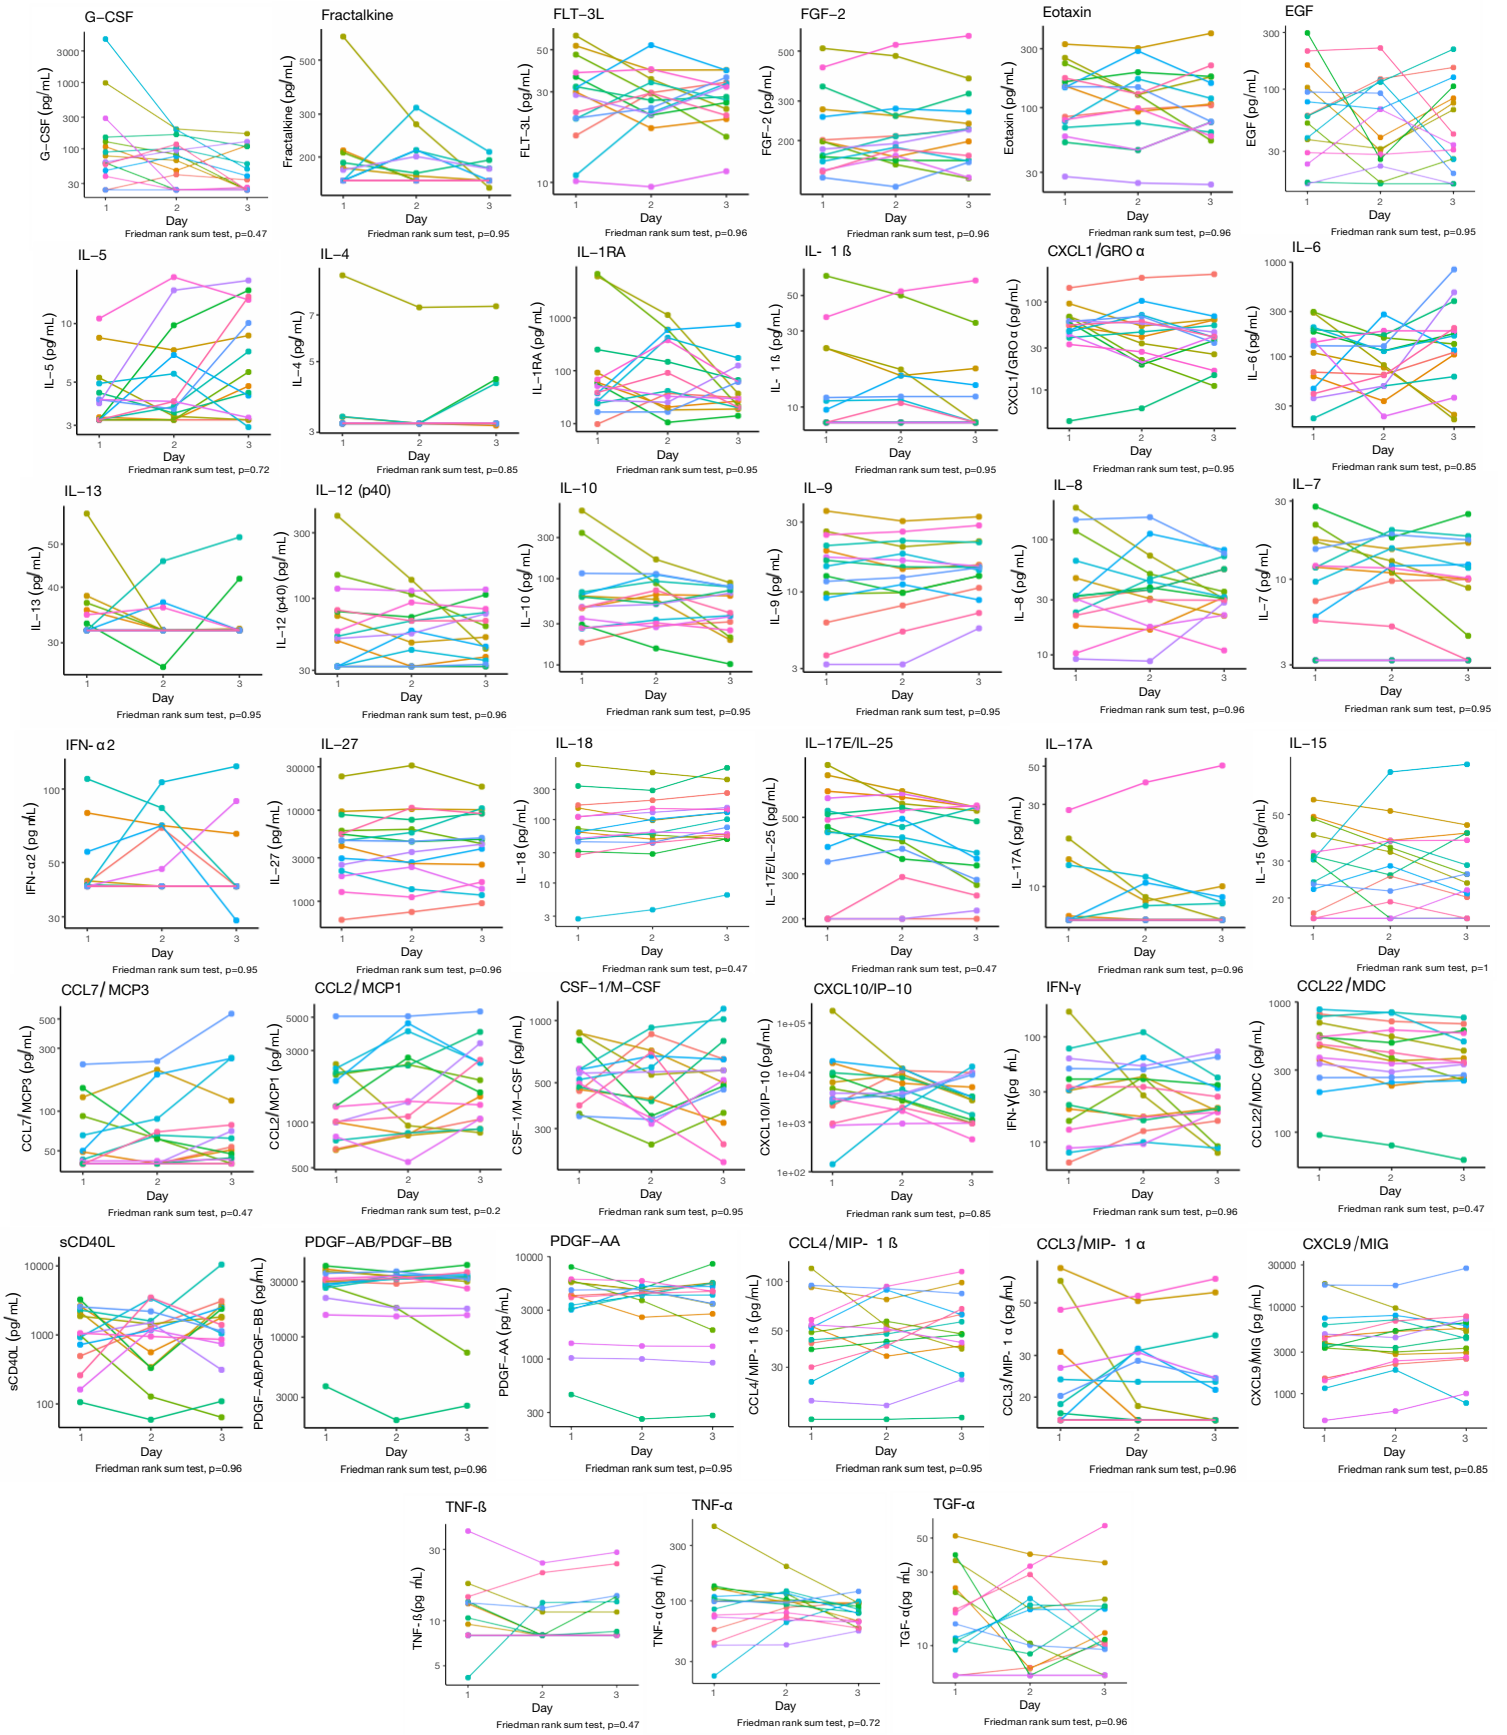

Cytokine levels of COVID-19 patients with samples at day 1, 2, and 3 of admission to the general wards. Each line represents a subject (COVID-19 patients with repetitive measures, n=15).



# Supplementary Figure 3. Cytokine expression levels and SOFA scores in COVID-19 and control patients.

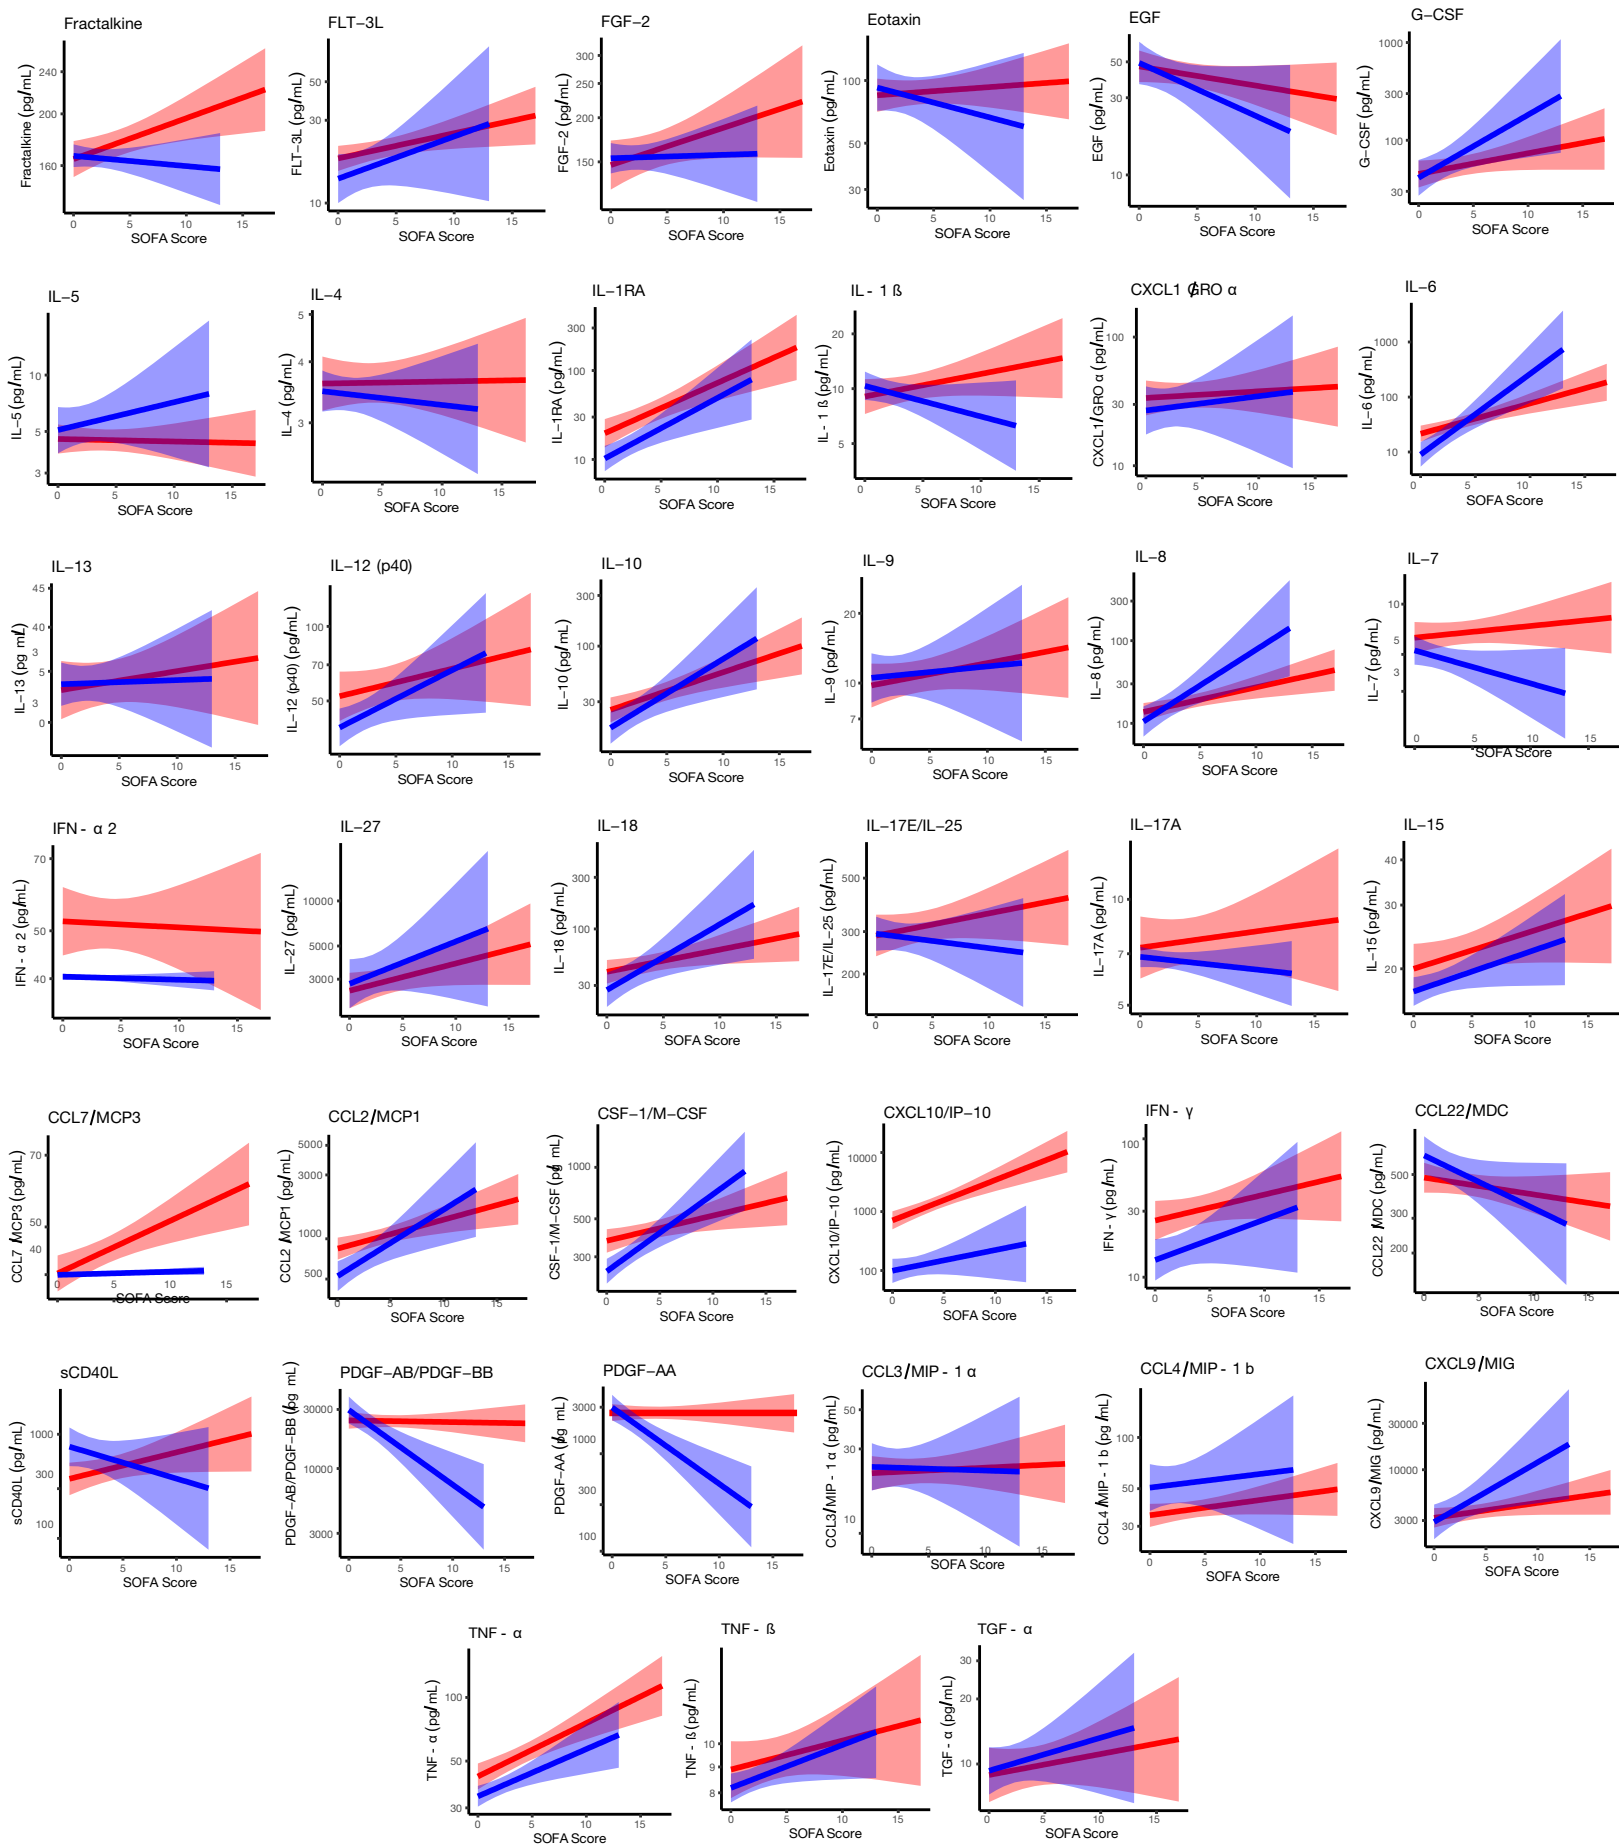

Blue indicates control patients and red indicates COVID-19 patients. The shaded area represents a 95% confidence interval around a line of best fit through the data points.

Supplementary Figure 4. Acute Kidney Injury staging and cytokine expression level correlations in COVID-19 positive patients.

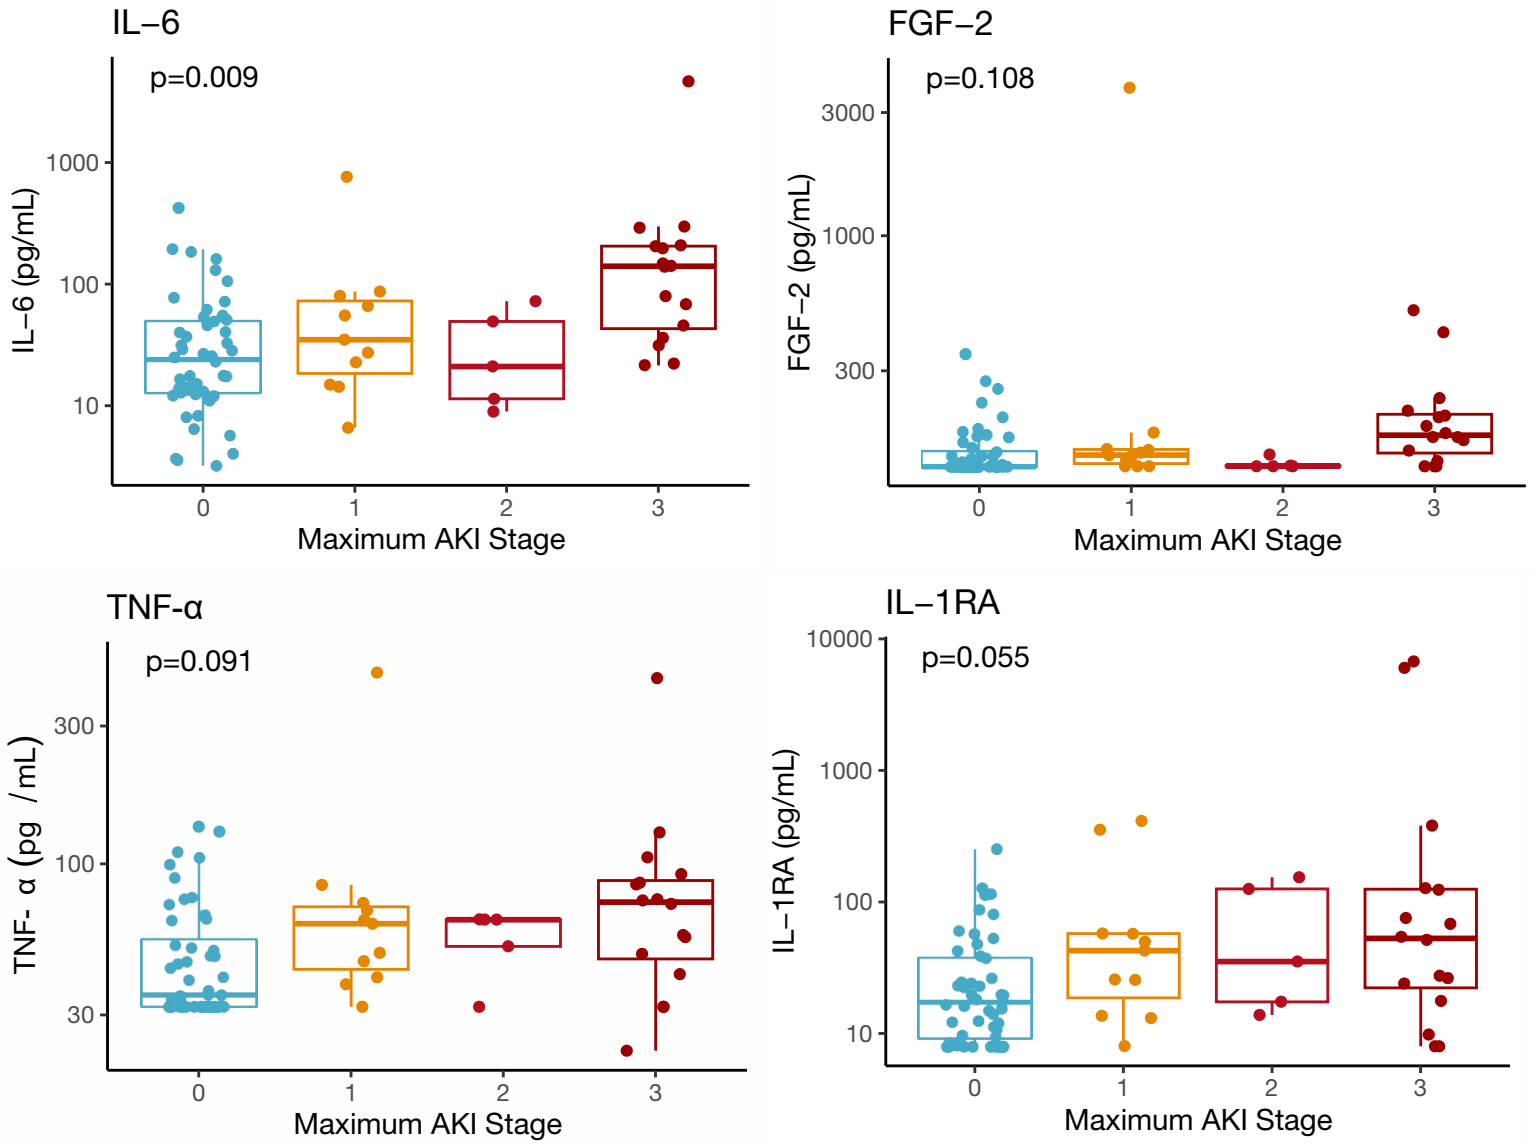

The horizontal line in the box plot represents the median and interquartile range. Each dot represents a subject. P-values accompanying each comparison were computed from Spearman's correlation formula and adjusted for multiple comparison.
